# Supplementary material for: Open conformers of HLA-F are high-affinity ligands of the activating NK-cell receptor KIR3DS1
Source: Springer Nature journal article supplement (doi:10.1038/ni.3513), 2016-07-25
Supplement: 41590_2016_BFni3513_MOESM38_ESM.pdf [file 41590_2016_BFni3513_MOESM38_ESM.pdf]

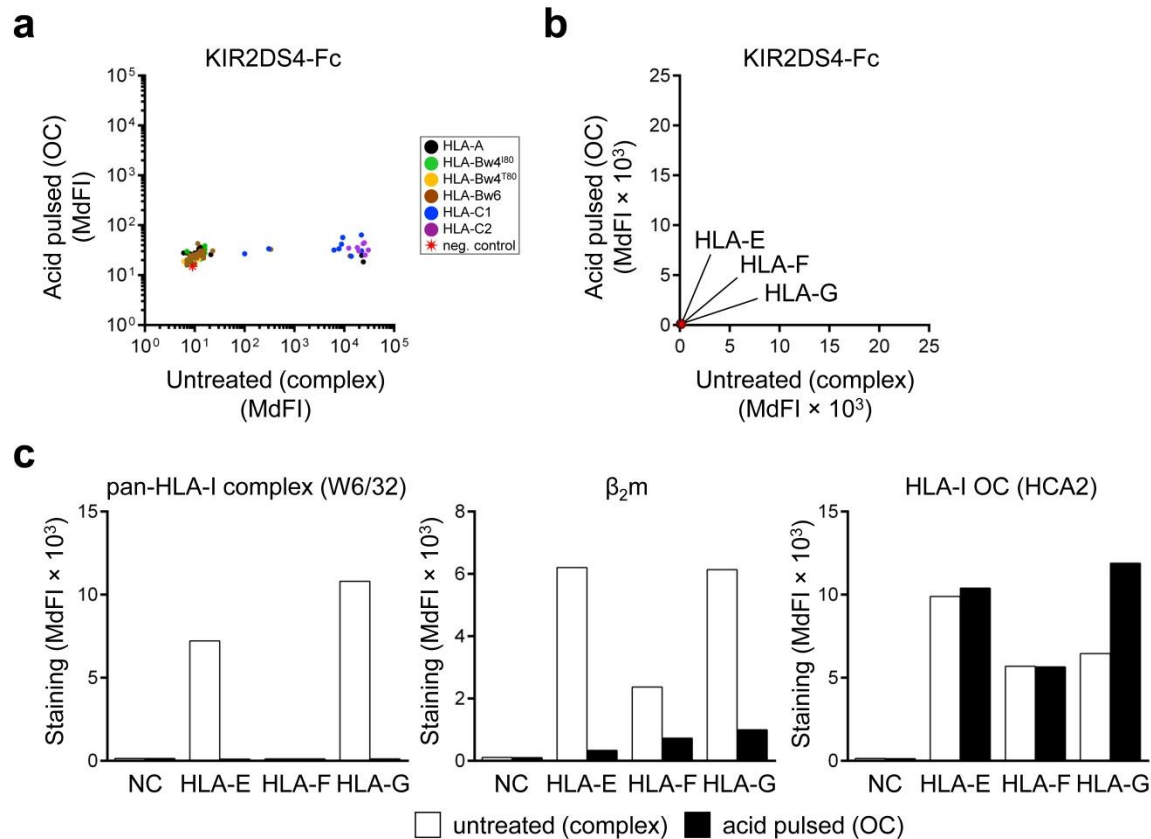

### Supplementary Figure 1

KIR2DS4-Fc and antibody staining of beads coated with HLA class I.

(a, b) Binding of KIR2DS4-Fc to untreated (complex) versus acid-pulsed (open conformer; OC) beads coated with classical HLA class I allotypes (in a); HLA-E, -F, or -G (in b); or nothing (negative control beads; red star) was measured and reported as median fluorescence intensity (MdfI). Each dot indicates a single HLA class I allotype, and color coding is used in a to indicate HLA class I allotype grouping (see legend and On-line Methods for further details). (c) HLA-E, -F-, and -G-coated beads and negative control beads (NC) were untreated (complex) or acid pulsed (OC) and stained with anti-pan-HLA class I complex antibody (clone: W6/32) (left panel) to assess for complex conformation on beads, anti- $\beta_2m$  antibody (middle panel) to quantify  $\beta_2m$  content, and an antibody to HLA class I OCs (clone: HCA2) (right panel) to assess HLA-F reactivity; median fluorescence intensity (MdfI) is reported.

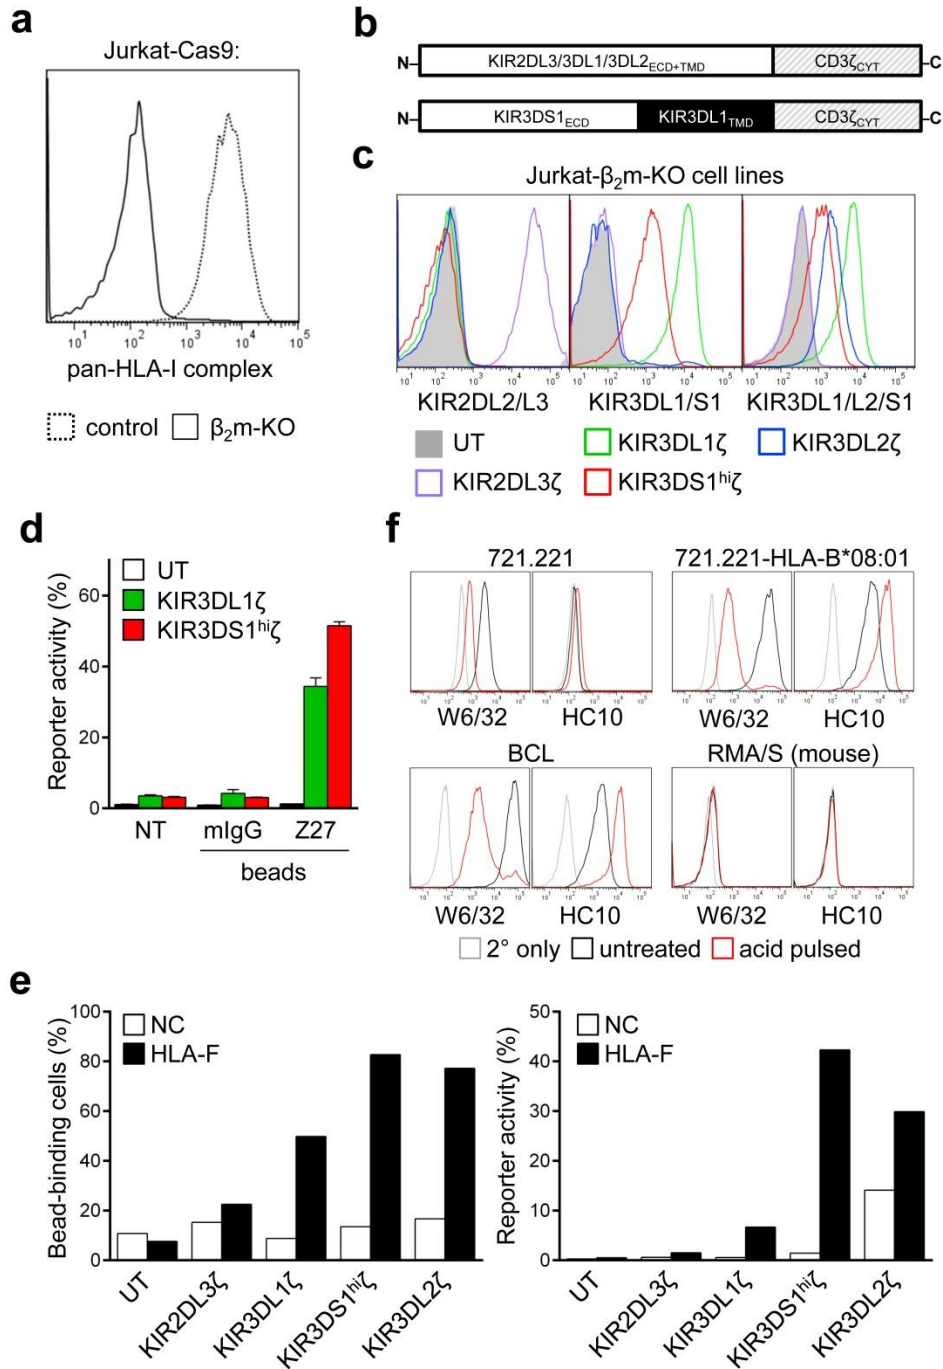

## Supplementary Figure 2

Generation and testing of KIR $\zeta^+$  Jurkat reporter cell lines and assessment of HLA class I OCs on target cells.

(a) Staining of anti-pan- $\beta_2m$ -HLA class I complex was assessed in Jurkat cells that underwent CRISPR/Cas9-mediated  $\beta_2m$  knockout (KO). (b) KIR $\zeta$  chimeric receptors for inhibitory and activating KIRs were designed by fusing the extracellular domain (ECD) and transmembrane domain (TMD) of the indicated KIRs with the triple immunoreceptor tyrosine-based activating motif (ITAM)-containing cytoplasmic tail (CYT) of CD3 $\zeta$ . (c) KIR expression was assessed in Jurkat- $\beta_2m$ -KO cells stably transduced with the indicated KIR $\zeta$  chimeric receptors via staining with anti-KIR2DL2-KIR2DL3, anti-KIR3DS1-KIR3DL1, and anti-KIR3DL1-KIR3DL2-KIR3DS1; UT signifies untransduced. (d) Reporter activity of untransduced (UT), KIR3DL1 $\zeta^+$  and KIR3DS1<sup>hi</sup> $\zeta^+$  Jurkat cells co-incubated with cell-sized beads covalently conjugated to irrelevant mouse IgG (mIgG) or anti-KIR3DS1-KIR3DL1 antibody (Z27) was measured as percentage

of CD69<sup>hi</sup> Jurkat cells. **(e)** Untransduced (UT), KIR2DL3 $\zeta^+$ , KIR3DL1 $\zeta^+$ , KIR3DS1<sup>hi</sup> $\zeta^+$  and KIR3DL2 $\zeta^+$  Jurkat cells were co-incubated with streptavidin beads coated with free biotin (negative control; NC) or biotinylated HLA-F monomers (HLA-F) and the percentage of bead-binding cells (left panel) as well as reporter activity as a percentage of CD69<sup>hi</sup> cells (right panel) was measured. **(f)** Staining of anti-pan-HLA class I complex (clone: W6/32) and an antibody to HLA class I OCs (clone: HC10) antibodies was measured on untreated and acid-pulsed cell lines to confirm OC generation; 2° only signifies secondary only staining. Data in **d** is representative of three experiments and shows three technical replicates; **a**, **c**, **e**, and **f** show one experiment; **d** shows mean + s.d.

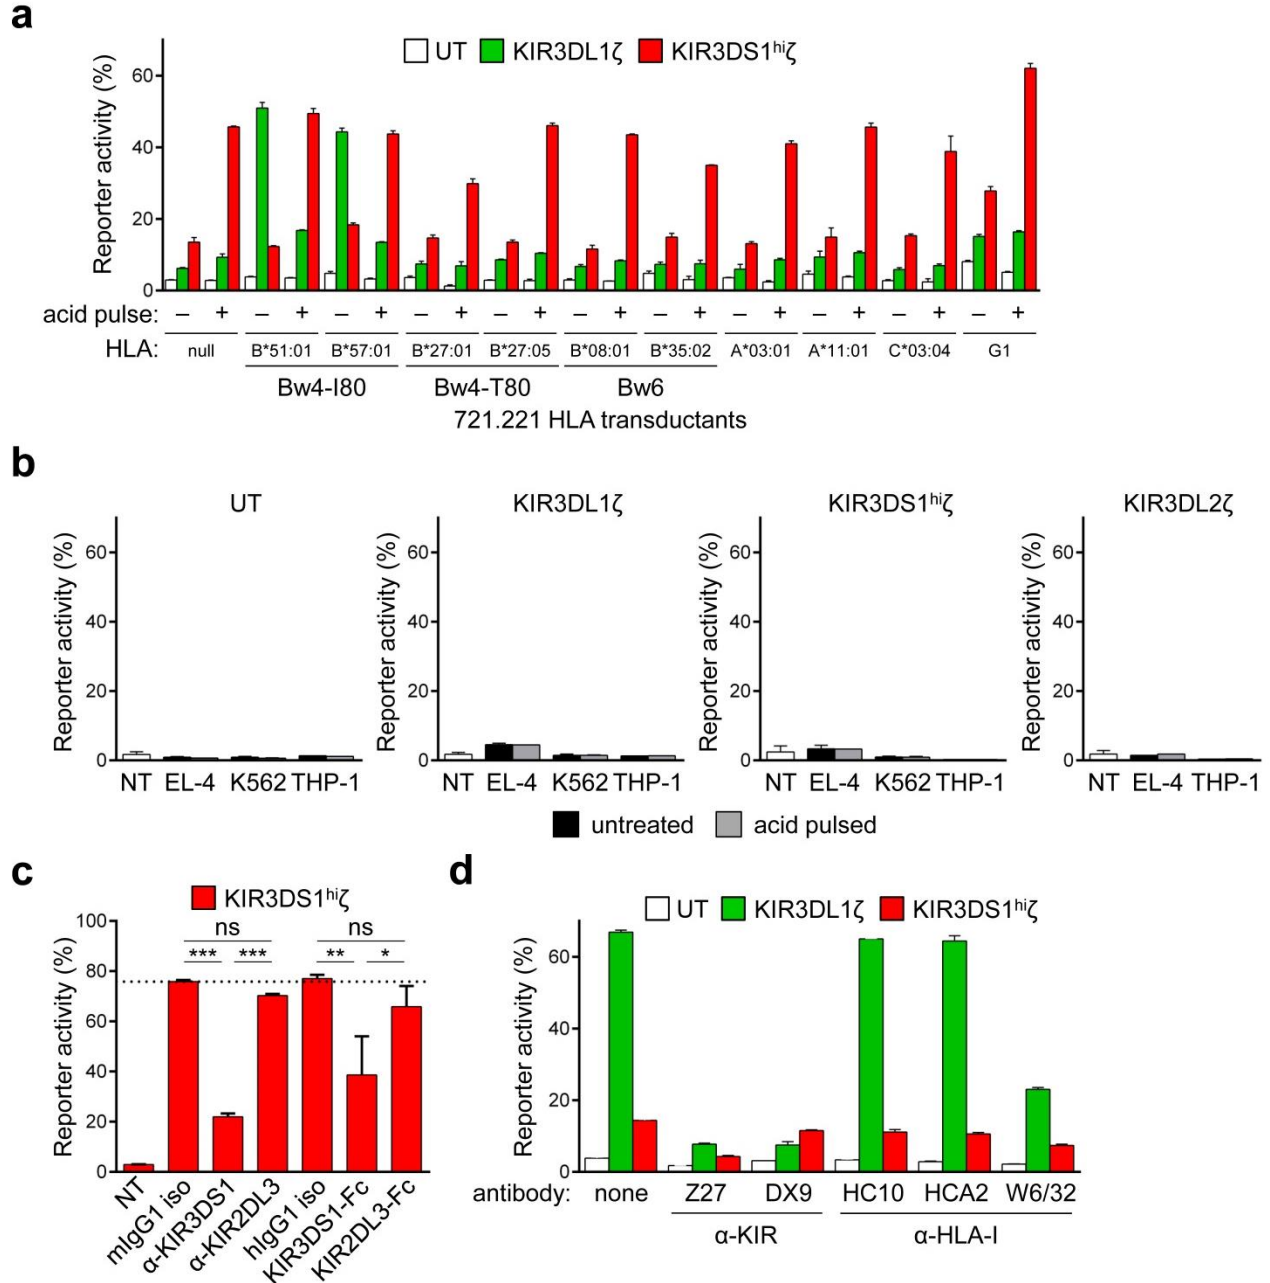

### Supplementary Figure 3

Triggering of KIR<sup>+</sup> Jurkat reporter cells by various cell lines.

(a) Reporter activity of untransduced (UT), KIR3DL1<sup>+</sup> and KIR3DS1<sup>hi</sup> Jurkat cells co-incubated with untreated (-) or acid pulsed (+) 721.221 cells expressing the indicated HLA class I allotypes was measured as percentage of CD69<sup>hi</sup> Jurkat cells. (b) Reporter activity of untransduced (UT), KIR3DL1<sup>+</sup>, KIR3DS1<sup>hi</sup> and KIR3DL2<sup>+</sup> Jurkat cells co-incubated with untreated (black bars) or acid-pulsed (gray bars) cell lines was measured as percentage of CD69<sup>hi</sup> Jurkat cells. Cell lines used were EL-4 cells (mouse T-lymphoblastoid cell line), K562 cells (human chronic myelogenous leukemia line), and THP-1 cells (human acute monocytic leukemia line), all of which do not express HLA-F; NT signifies no target cells. (c) Reporter activity of KIR3DS1<sup>hi</sup> Jurkat cells co-incubated with acid-pulsed HLA-Bw4<sup>+</sup> BCL in the presence of the indicated antibodies or KIR-Fc constructs (50 μg/mL each) was measured as percentage of CD69<sup>hi</sup> Jurkat cells. The labels indicate the following: NT, no target cells; mIgG1 iso, mouse IgG1 isotype control; α-KIR3DS1, anti-KIR3DS1-KIR3DL1; α-KIR2DL3, anti-KIR2DL2-KIR2DL3; hlgG1 iso, human IgG1 isotype control antibody; KIR3DS1-Fc, KIR3DS1-Fc fusion construct with Fc region of hlgG1; KIR2DL3-Fc, KIR2DL3-Fc fusion construct with Fc region of hlgG1. (d) Reporter activity of

untransduced (UT), KIR3DL1 $\zeta^+$  and KIR3DS1 $^{hi}\zeta^+$  Jurkat cells co-incubated with untreated HLA-Bw4 $^+$  BCLs in the presence of the indicated antibodies to KIR or HLA class I (25  $\mu\text{g}/\text{mL}$  each) was measured as percentage of CD69 $^{hi}$  Jurkat cells. Blocking antibodies used (clone and antigen) are the following: Z27, anti-KIR3DS1-KIR3DL1 antibody; DX9, anti-KIR3DL1; HC10, anti-HLA class I OC; HCA2, anti-HLA class I OC; W6/32, anti-pan-HLA class I complex. Data in **a**, **c**, and **d** show three technical replicates from one experiment; **b** shows pool data from two independent experiments; **a**, **b**, **c**, and **d** show mean + s.d. In **c**, a one-way ANOVA with Tukey multiple comparisons test comparing all columns was performed; only some statistics are shown; \* $P < 0.01$ , \*\* $P < 0.001$  and \*\*\* $P < 0.0001$ .

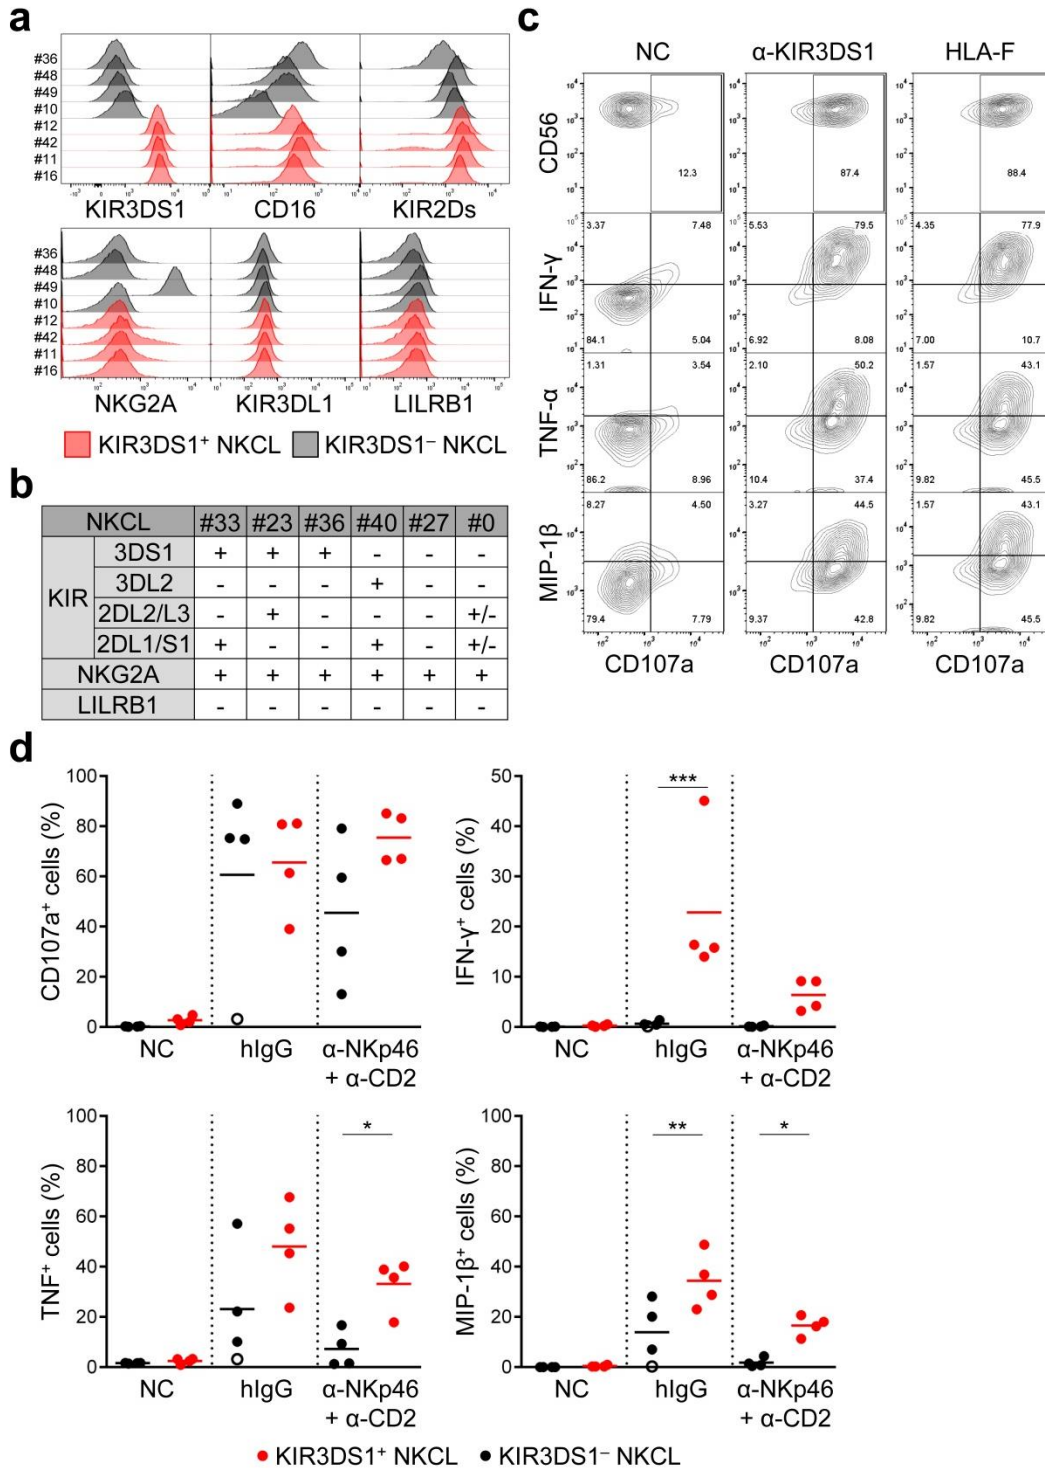

#### Supplementary Figure 4

NKCL phenotypes and functional responses.

(a, b) NK-cell lines used for plate-bound ligand assays (in a) and clones used for HIV-1 replication inhibition assays (in b) were stained for various NK-cell receptors, as indicated; KIR2Ds in a was measured by staining with anti-KIR2DL2-KIR2DL3 and anti-KIR2DL1-KIR2DS1 having the same fluorophore. In b, '+' denotes >90% expression of the indicated receptor, '-' denotes a frequency of <5%, and '+/-' denotes a frequency >5% (in both cases for clone #0, ~10%). (c) Representative flow plots of degranulation (i.e. CD107a

expression) and production of IFN- $\gamma$ , TNF- $\alpha$ , and MIP-1 $\beta$  by one KIR3DS1<sup>+</sup> NK-cell line seeded onto well plates coated with irrelevant protein (negative control; NC), anti-KIR3DS1-KIR3DL1 (plate-bound  $\alpha$ -KIR3DS1), or HLA-F monomers (plate-bound HLA-F) are shown. **(d)** Degranulation and production of IFN- $\gamma$ , TNF- $\alpha$ , and MIP-1 $\beta$  by KIR3DS1<sup>+</sup> (red dots) and KIR3DS1<sup>-</sup> (black dots) NKCLs seeded onto well plates coated with irrelevant protein (negative control; NC), human IgG (hIgG), or anti-NKp46 and anti-CD2 ( $\alpha$ -NKp46 +  $\alpha$ -CD2) were measured. The percentages of CD107a<sup>+</sup> (top left panel), IFN- $\gamma$ <sup>+</sup> (top right panel), TNF<sup>+</sup> (bottom left panel), and MIP-1 $\beta$ <sup>+</sup> (bottom right panel) NKCLs are presented. For **d**, which shows mean, one-way ANOVA with Sidak multiple comparisons test comparing select columns was performed, and all statistically significant differences are presented; \* $P < 0.05$ , \*\* $P < 0.01$  and \*\*\* $P < 0.001$ .

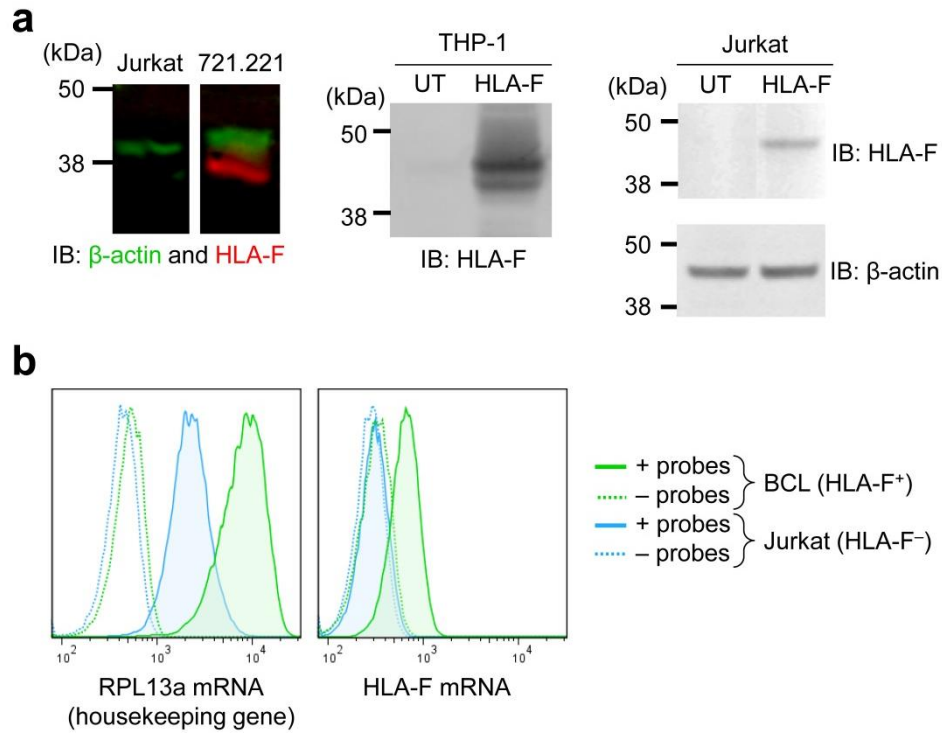

### Supplementary Figure 5

Quality-control testing of the antibody to HLA-F used for immunoblot analysis and HLA-F mRNA probes for fluorescence *in situ* hybridization.

(a) Cell lysates (non-nuclear) from cell lines were run on reducing/denaturing SDS-PAGE, followed by immunoblotting (IB) for HLA-F and  $\beta$ -actin (loading control). Left image shows Jurkat cells (HLA-F<sup>-</sup>) and 721.221 cells (HLA-F<sup>+</sup>). Middle image shows THP-1 cells (HLA-F-deficient) and THP-1 cells transduced with N-terminally FLAG-tagged HLA-F. Right image shows Jurkat cells and Jurkat cells transduced with N-terminally FLAG-tagged HLA-F. (b) Fluorescent *in situ* hybridization and flow cytometry was done on an HLA-F<sup>+</sup> cell line (BCL) and an HLA-F<sup>-</sup> cell line (Jurkat cells) with probes for HLA-F mRNA and also RPL13a mRNA (a housekeeping gene). Dotted histograms indicate staining without probes ('- probe'; negative control) and solid-line, filled histograms are staining with probe ('+ probe').



## SUPPLEMENTARY TABLES

**Supplementary Table 1** Antibodies used in this study.

| Antibody                               | Clone (Cat#)   | Fluorophore                  | Manufacturer    | Dilution   | Application                      |
|----------------------------------------|----------------|------------------------------|-----------------|------------|----------------------------------|
| anti-KIR3DL1/S1                        | Z27.3.7        | unconjugated, PE             | Beckman Coulter | 1:5        | Flow cytometry, blocking assays  |
| anti-KIR3DL1                           | DX9            | unconjugated, PE, BV421      | BioLegend       | 1:25       | Flow cytometry, blocking assays  |
| anti-KIR3DL1/L2                        | 5.133          | PE                           | Miltenyi        | 1:5        | Flow cytometry                   |
| anti-KIR3DL2                           | 539304         | PE                           | R&D             | 1:5        | Flow cytometry                   |
| anti-KIR2DL2/L3                        | DX27           | PE, PE-Cy7                   | Miltenyi        | 1:50       | Flow cytometry                   |
| anti-pan-HLA-I complex                 | W6/32          | unconjugated, BV510, PE, APC | BioLegend       | 1:20       | Flow cytometry, blocking assays  |
| anti-HLA-I OC (HC10)                   | HC10           | unconjugated                 | tebu-bio        | 1:10       | Flow cytometry, blocking assays  |
| anti-HLA-I OC (HCA2)                   | HCA2           | unconjugated                 | tebu-bio        | 1:10       | Flow cytometry, blocking assays  |
| anti-CD3 (OKT3)                        | OKT3           | unconjugated                 | BioLegend       | (see text) | plate coating                    |
| anti-CD28                              | CD28.2         | unconjugated                 | BioLegend       | (see text) | plate coating                    |
| anti-CD3                               | HIT3a          | PE, FITC, AF700, PerCP-Cy5.5 | BioLegend       | 1:50       | Flow cytometry                   |
| anti-CD4                               | RPA-T4         | PE, Pacific Blue             | BioLegend       | 1:50       | Flow cytometry                   |
| anti-CD69                              | FN50           | BV421                        | BioLegend       | 1:50       | Flow cytometry                   |
| anti-tetherin                          | RS38E          | APC                          | BioLegend       | 1:20       | Flow cytometry                   |
| anti-HIV-1 p24                         | KC57           | FITC                         | BD Biosciences  | 1:100      | Flow cytometry                   |
| anti-human IgG(Fc) F(ab') <sub>2</sub> | (Cat#: H10104) | PE                           | Thermo Fisher   | 1:50       | Flow cytometry (secondary stain) |
| mouse anti- $\beta$ -actin             | mAbcam 8224    | unconjugated                 | Abcam           | 1:5,000    | Immunoblotting (primary stain)   |
| rabbit anti-HLA-F                      | EPR6803        | unconjugated                 | Abcam           | 1:1,000    | Immunoblotting (primary stain)   |

| <b>Antibody</b>           | <b>Clone (Cat#)</b> | <b>Fluorophore</b> | <b>Manufacturer</b> | <b>Dilution</b> | <b>Application</b>               |
|---------------------------|---------------------|--------------------|---------------------|-----------------|----------------------------------|
| goat anti-rabbit IgG(H+L) | (Cat#: 926-68071)   | IRDye 680RD        | LI-COR              | 1:10,000        | Immunoblotting (secondary stain) |
| anti-CD56                 | HCD56               | BV421              | BioLegend           | 1:50            | Flow cytometry                   |
| anti-CD16                 | 3G8                 | BV785              | BioLegend           | 1:50            | Flow cytometry                   |
| anti-NKG2A                | Z199                | APC                | Beckman Coulter     | 1:25            | Flow cytometry                   |
| anti-LILRB1               | GHI/75              | PE-Cy5             | BD Biosciences      | 1:10            | Flow cytometry                   |
| anti-KIR2DL1/S1           | HP-MA4              | PE, PerCP-Cy5.5    | BioLegend           | 1:50            | Flow cytometry                   |
| mIgG1 isotype control     | MG1-45              | unconjugated       | BioLegend           | (see text)      | Flow cytometry, blocking assays  |
| anti-CD107a               | H4A3                | PE-Cy7             | BioLegend           | 1:66.7          | Flow cytometry                   |
| anti-IFN- $\gamma$        | 4S.B3               | AF647              | BioLegend           | 1:20            | Flow cytometry                   |
| anti-TNF- $\alpha$        | MAb11               | BV650              | BioLegend           | 1:20            | Flow cytometry                   |
| anti-MIP-1 $\beta$        | FL34Z3L             | PerCP-eFluor710    | eBioscience         | 1:20            | Flow cytometry                   |
